# Supplementary material for: Efficient and recyclable Cu2(BDC)2(BPY)-catalyzed oxidative amidation of terminal alkynes: role of bipyridine ligand
Source: Royal Society of Chemistry journal article supplement (doi:10.1039/c4cy01074d), 2014-09-24
Supplement: c4cy01074d1.pdf [file c4cy01074d1.pdf]

**Efficient and Recyclable  $\text{Cu}_2(\text{BDC})_2(\text{BPY})$ -Catalyzed Oxidative Amidation of Terminal Alkynes: Role of Bipyridine Ligand**

Hanh T. N. Le, Thuan V. Tran, Nam T.S. Phan, Thanh Truong\*

Department of Chemical Engineering, HCMC University of Technology, VNU-HCM,  
268 Ly Thuong Kiet, District 10, Ho Chi Minh City, Viet Nam

\*Email: [tvthanh@hcmut.edu.vn](mailto:tvthanh@hcmut.edu.vn)

Ph: (+84 8) 38647256 ext. 5681

Fx: (+84 8) 38637504

## **SUPPORTING INFORMATION**

### **Materials and instrumentation**

All reagents and starting materials were obtained commercially from Acros, Sigma-Aldrich and Merck, and were used as received without any further purification unless otherwise noted. Nitrogen physisorption measurements were conducted using a Micromeritics 2020 volumetric adsorption analyzer system. Samples were pretreated by heating under vacuum at 150 °C for 3 h. A Netzsch Thermoanalyzer STA 409 was used for thermogravimetric analysis (TGA) with a heating rate of 10 °C/min under a nitrogen atmosphere. Scanning electron microscopy studies were conducted on a S400 Scanning Electron Microscope (SEM). Transmission electron microscopy studies were performed using a JEOL JEM 1010 Transmission Electron Microscope (TEM) at 80 kV. The  $\text{Cu}_2(\text{BDC})_2(\text{BPY})$  sample was dispersed on holey carbon grids for TEM observation. Fourier transform infrared (FT-IR) spectra were obtained on a Nicolet 6700 instrument, with samples being dispersed on potassium bromide pallets. The chemisorption experiments were studied in a Micromeritics 2020 analyzer. For hydrogen temperature

programmed reduction ( $\text{H}_2$ -TPR), the sample was outgassed at 100 °C for 30 min with helium, then cooled down to room temperature, and exposed to 50 mL/min of 10%  $\text{H}_2/\text{Ar}$  as the temperature ramped at 2.5 °C/min to 600 °C. The amount of hydrogen consumption was determined from TCD signal intensities, which were calibrated using an  $\text{Ag}_2\text{O}$  reference sample. X-ray powder diffraction (XRD) patterns were recorded using a Cu  $K\alpha$  radiation source on a D8 Advance Bruker powder diffractometer.

Gas chromatographic (GC) analyses were performed using a Shimadzu GC 2010-Plus equipped with a flame ionization detector (FID) and an SPB-5 column (length = 30 m, inner diameter = 0.25 mm, and film thickness = 0.25  $\mu\text{m}$ ). The temperature program for GC analysis heated samples from 100 °C and held them at 100 °C for 1.0 min; heated them from 100 °C to 280 °C at 40 °C/min and held them at 280 °C for 2.5 min. Inlet and detector temperatures were set constant at 280 °C. Diphenyl ether was used as an internal standard to calculate reaction conversions. GC-MS analyses were performed using a Hewlett Packard GC-MS 5972 with a RTX-5MS column (length = 30 m, inner diameter = 0.25 mm, and film thickness = 0.5  $\mu\text{m}$ ). The temperature program for GC-MS analysis heated samples from 60 to 280 °C at 10 °C/min and held them at 280 °C for 2 min. Inlet temperature was set constant at 280 °C. MS spectra were compared with the spectra gathered in the NIST library. The  $^1\text{H}$  and  $^{13}\text{C}$  NMR were recorded on Bruker AV 300 spectrometers using residual solvent peak as a reference.

## **Preparation of MOFs**

### **1. Cu(BDC)**

The Cu(BDC) was prepared according to literature procedure [1]. In a typical preparation, a mixture of 1,4- benzenedicarboxylic acid ( $\text{H}_2\text{BDC}$ ) (0.332 g, 2 mmol), and  $\text{Cu}(\text{NO}_3)_2 \cdot 3\text{H}_2\text{O}$  (0.4235 g, 1.75 mmol) was dissolved in DMF (DMF = *N,N'*-dimethylformamide; 45 mL),

and the resulting solution was distributed to six 20 mL vials. The vial was then heated at 130 °C in an isothermal oven for 48 h. After cooling the vial to room temperature, the solid product was removed by decanting with mother liquor and washed in DMF (3 x 10 mL) for 3 days. Solvent exchange was then carried out with dichloromethane (DCM) (3 x 10 mL) at room temperature for 3 days. The material was then evacuated under vacuum at 160 °C for 6 h, yielding 0.308 g of Cu(BDC) in the form of blue crystals (77% based on copper nitrate).

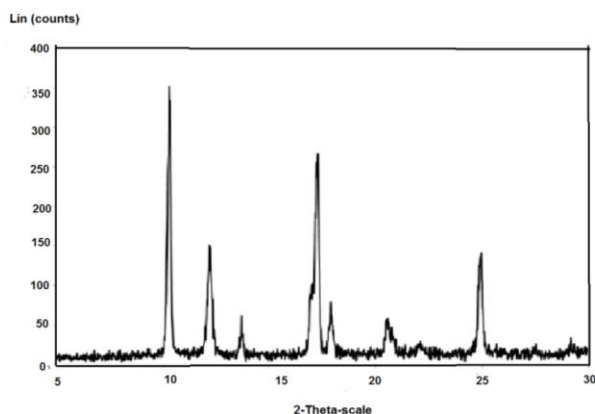

Fig S1. X – ray powder diffractogram of the Cu(BDC)

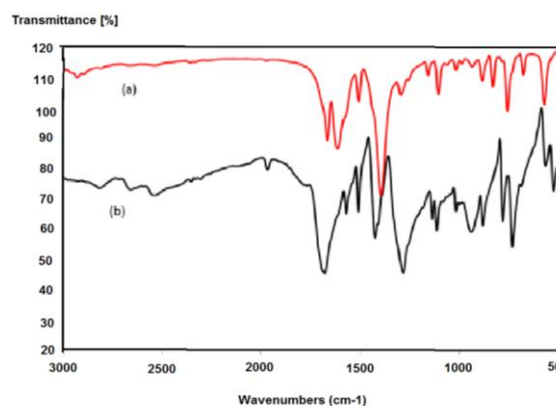

Fig S2. FT – IR spectra of the Cu(BDC) (a) and 1,4-Benzenedicarboxylic acid (b)

## 2. $\text{Cu}_3(\text{BTC})_2$

The procedure to prepare  $\text{Cu}_3(\text{BTC})_2$  was similar to that previously reported [2, 3]. In a typical preparation, a solid mixture of  $\text{Cu}(\text{NO}_3)_2 \cdot 3\text{H}_2\text{O}$  (0.438 g, 1.81 mmol) and 1,3,5-benzenetricarboxylic acid ( $\text{H}_3\text{BTC}$ ) (0.236 g, 1.12 mmol) was dissolved in a mixture of DMF (3 mL), ethanol (4 mL) and water (2 mL) in a 20 mL vial. The vial was heated at 85 °C

in an isothermal oven for 24 h, yielding light blue crystals. After cooling the vial to room temperature, the solid product was obtained by decanting with mother liquor and washed with DMF (3 x 8 mL). Solvent exchange was then carried out with ethanol (3 x 8 mL) at room temperature. The product was then dried under vacuum at 170 °C for 6 h, yielding 0.285 g of MOF-199 in the form of deep purple crystals (84% based on 1,3,5-benzenetricarboxylic acid).

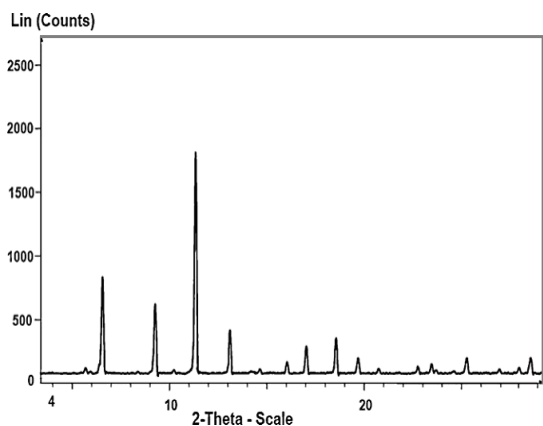

Fig S3. X – ray powder diffractogram of the MOF-199

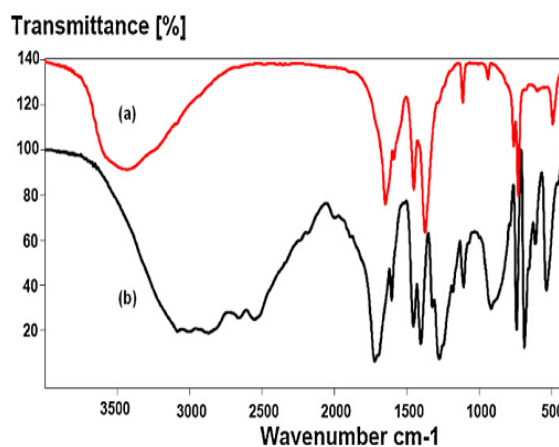

Fig S4. FT – IR spectra of the MOF-199 (a) and 1,3,5-benzenetricarboxylic acid (b)

### 3. $\text{Ni}_2(\text{BDC})_2(\text{DABCO})$ :

The  $\text{Ni}_2(\text{BDC})_2(\text{DABCO})$  was readily synthesized following the procedures [4, 5]. The solution of  $\text{H}_2\text{BDC}$  ( $\text{H}_2\text{BDC}$  = 1,4-benzenedicarboxylic acid; 0.415 g, 2.50 mmol), DABCO (DABCO = 1,4-diazabicyclo[2.2.2]octane; 0.168 g, 1.50 mmol), and  $\text{Ni}(\text{NO}_3)_2 \cdot 6\text{H}_2\text{O}$  (0.580 g, 2.00 mmol) in DMF (DMF = N,N'-dimethylformamide; 15 ml) was heated at 100 °C for 48 h. The solid product was collected from mother liquor, washed with copious amounts of DMF and methanol, evacuated under vacuum at 140 °C for 6 h, yielding 0.424g of

$\text{Ni}_2(\text{BDC})_2(\text{DABCO})$  in the form of deep green crystalline powder (76% based on nickel nitrate).

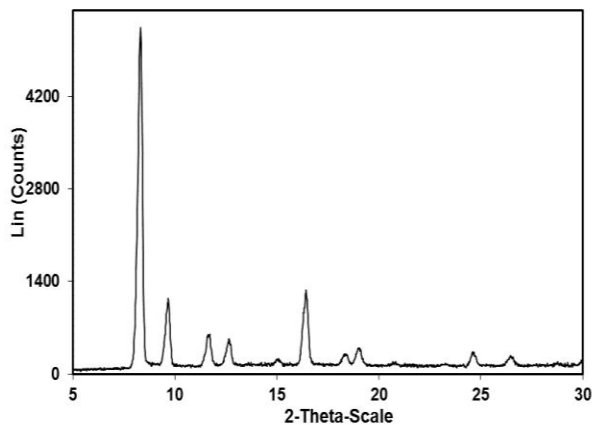

Fig S5. X – ray powder diffractogram of the  $\text{Ni}_2(\text{BDC})_2(\text{DABCO})$

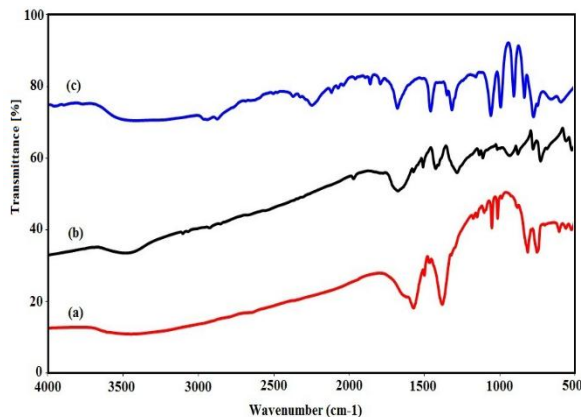

Fig S6. FT – IR spectra of 1,4-benzenedicarboxylic acid (a), 1,4-diazabicyclo[2.2.2]octane (b), and the  $\text{Ni}_2(\text{BDC})_2(\text{DABCO})$  (c)

#### 4. $\text{Mn}_2(\text{BDC})_2(\text{DMF})_2$

The  $\text{Mn}_2(\text{BDC})_2(\text{DMF})_2$  was prepared according to literature procedure [6]. In a typical preparation, a mixture of 1,4- benzenedicarboxylic acid ( $\text{H}_2\text{BDC}$ ) (0.5457 g, 3.30 mmol), and  $\text{MnCl}_2 \cdot 4\text{H}_2\text{O}$  (0.4335 g, 2.20 mmol) was dissolved in DMF (DMF = *N,N'*-dimethylformamide; 40 mL), and the resulting solution was distributed to eight 10 mL vials. The vial was then heated at 125 °C in an isothermal oven for 24 h. After cooling the vial to room temperature, the solid product was removed by decanting with mother liquor and washed in DMF (3 x 10 mL) for 3 days. Solvent exchange was then carried out with dichloromethane (DCM) (1 x 10 mL) at room temperature for 1 day. The material was then

evacuated under vacuum at 120 °C for 6 h, yielding 0.161 g of  $\text{Mn}_2(\text{BDC})_2(\text{DMF})_2$  in the form of white crystals (25% based on manganese chloride).

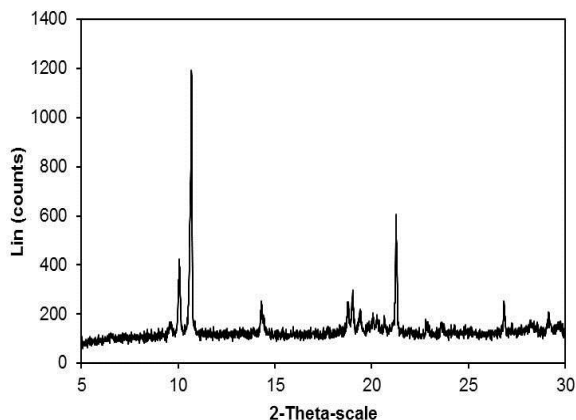

Fig S7. X – ray powder diffractogram of the  $\text{Mn}_2(\text{BDC})_2(\text{DMF})_2$

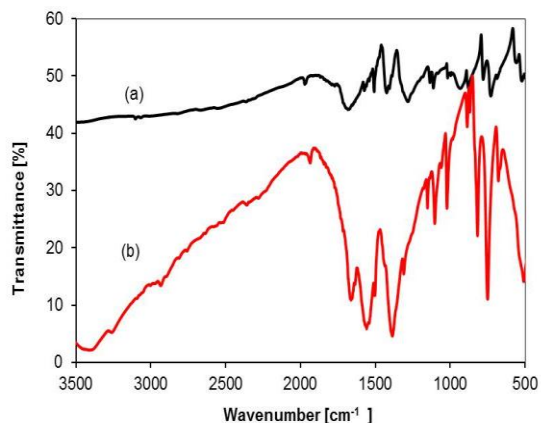

Fig S8. FT-IR spectra of 1,4-benzenedicarboxylic acid (a) & the  $\text{Mn}_2(\text{BDC})_2(\text{DMF})_2$ (b)

## 5. $\text{Co}_2(\text{BDC})_2(\text{DABCO})$

The  $\text{Co}_2(\text{BDC})_2(\text{DABCO})$  was prepared according to literature procedure [7].  $\text{H}_2\text{BDC}$  ( $\text{H}_2\text{BDC}$  = 1,4-benzenedicarboxylic acid; 0.332 g, 2 mmol), DABCO (DABCO = 1,4-diazabicyclo[2.2.2]octane; 0.112 g, 1 mmol), and  $\text{Co}(\text{NO}_3)_2 \cdot 6\text{H}_2\text{O}$  (0.58 g, 2 mmol) was dissolved in DMF (DMF =  $\text{N,N}'$ -dimethylformamide; 15 ml). The resulting solution was distributed to two 20 ml vials. The vials were then heated at 100 °C in an isothermal oven for 48 h. After cooling the vials to room temperature, the solid product was removed by decanting with mother liquor and washed in DMF (3 x 10 ml) for 3 days. Solvent exchange was carried out with methanol (3 x 10 ml) at room temperature for 3 days. The material was then evacuated under vacuum at 140 °C for 6 h, yielding 0.407 g of  $\text{Co}_2(\text{BDC})_2(\text{DABCO})$  in the form of purple crystals (73% yield)

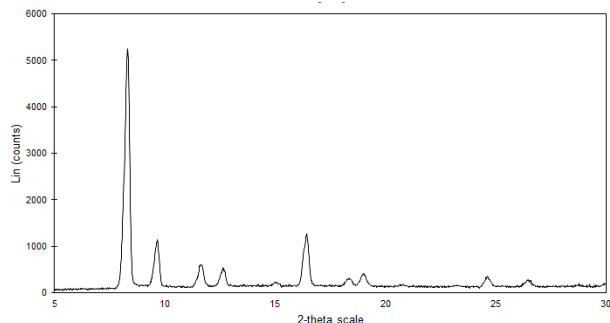

Fig S9. X – ray powder diffractogram of the  $\text{Co}_2(\text{BDC})_2(\text{BDC})_2$

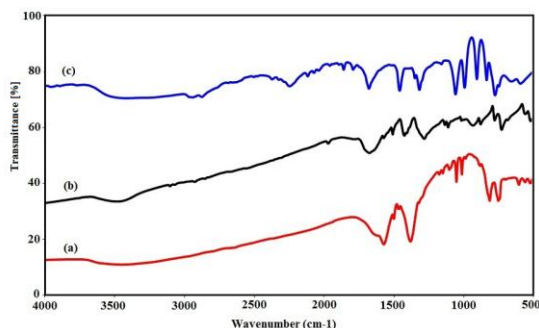

Fig S10. FT-IR spectra of the  $\text{Ni}_2(\text{BDC})_2(\text{DABCO})$  (a) , 1,4-benzenedicarboxylic acid (b), and 1,4-diazabicyclo[2.2.2]octane (c)

## 6. $\text{Cu}_2(\text{BDC})_2(\text{DABCO})$

The  $\text{Cu}_2(\text{BDC})_2(\text{DABCO})$  was prepared according to literature procedure [8-11]. Herein, a mixture of  $\text{H}_2\text{BDC}$  ( $\text{H}_2\text{BDC}$  = 1,4-benzenedicarboxylic acid; 0.506 g, 3.1 mmol), DABCO (DABCO = 1,4-diazabicyclo[2.2.2]octane; 0.188 g, 1.67 mmol), and  $\text{Cu}(\text{NO}_3)_2 \cdot 3\text{H}_2\text{O}$  (0.8 g, 3.3 mmol) was dissolved in DMF (DMF = N,N'-dimethylformamide; 80 ml). The mixture was stirred for 2 h, and the resulting solution was then distributed to eight 10 ml vials. The vial was heated at  $120^\circ\text{C}$  in an isothermal oven for 48 h, forming blue crystals. After cooling the vial to room temperature, the solid product was removed by decanting with mother liquor and washed with DMF (3 x 10 ml). Solvent exchange was carried out with methanol (3 x 10 ml) at room temperature. The product was then dried at  $140^\circ\text{C}$  for 6 h under vacuum, yielding 0.57 g of the metal-organic framework  $\text{Cu}_2(\text{BDC})_2(\text{DABCO})$  as light blue crystals (66% based on 1,4-benzenedicarboxylic acid)

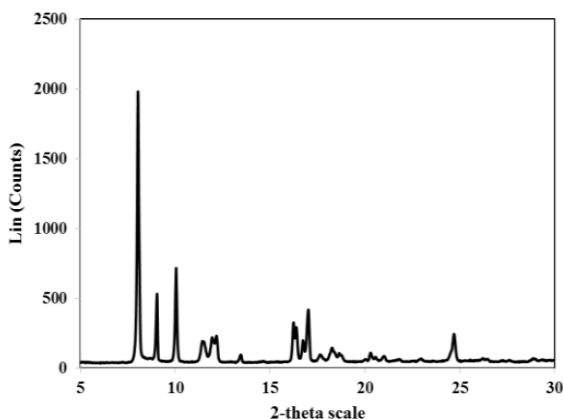

Fig S11. X – ray powder diffractogram of the  $\text{Cu}_2(\text{BDC})_2(\text{DABCO})$

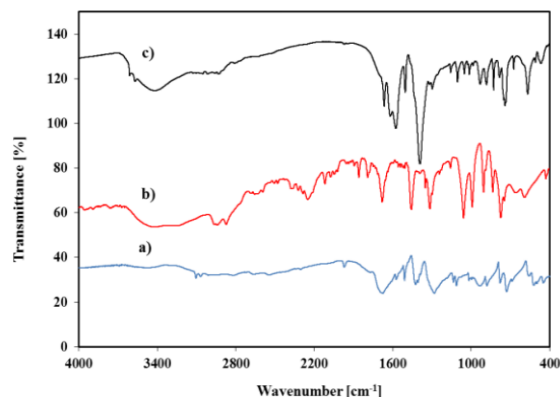

Fig S12. FT – IR spectra of 1,4-Benzene-dicarboxylic acid (a), 1,4-diazabicyclo[2.2.2]octane (b), and the  $\text{Cu}_2(\text{BDC})_2(\text{DABCO})$  (c)

## 7. Ni(HBTC)(BPY)

The  $\text{Cu}_2(\text{BDC})_2(\text{DABCO})$  was prepared according to literature procedure [12]. In the typical preparation, a solid mixture of  $\text{H}_3\text{BTC}$  ( $\text{H}_3\text{BTC}$  = Benzene-1,3,5-tricarboxylic acid; 0.442 g, 2 mmol), 4,4'-bipyridyl (0.318 g, 2 mmol), and  $\text{Ni}(\text{NO}_3)_2 \cdot 6\text{H}_2\text{O}$  (0.58 g, 2 mmol) was dissolved in DMF (DMF = N,N'-dimethylformamide; 15 ml). The resulting solution was distributed to two 20 ml vials. The vials were then heated at 100 °C in an isothermal oven for 48 h. After cooling the vials to room temperature, the solid product was removed by decanting with mother liquor and washed in DMF (3 x 10 ml) for 3 days. Solvent exchange was carried out with dichloromethane (3 x 10 ml) at room temperature for 3 days. The material was then evacuated under vacuum at 140 °C for 6 h, yielding 0.592 g of Ni(HBTC)(BPY) in the form of light blue



crystals (70% yield).

## 8. $\text{Fe}_3\text{O}(\text{BDC})_3$

Herein, the  $\text{Fe}_3\text{O}(\text{BDC})_3$  was prepared according to literature procedure [13,14].

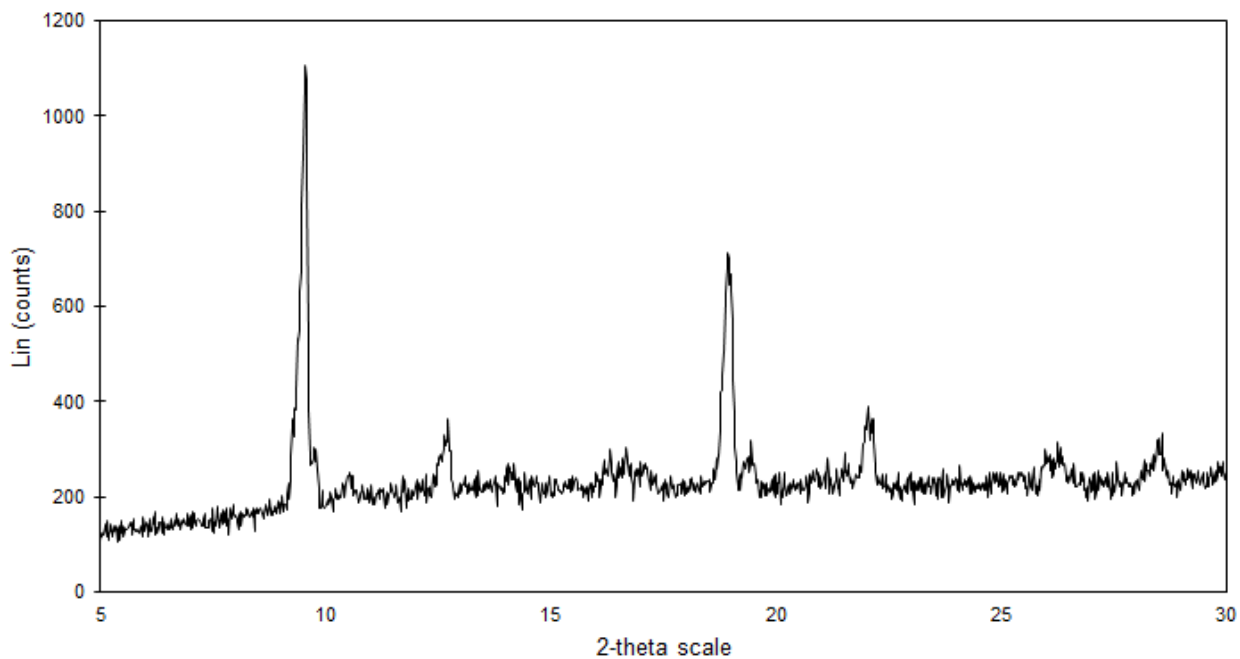

Fig S12. X – ray powder diffractogram of the  $\text{Fe}_3\text{O}(\text{BDC})_3$

## 9. ZIP-67

In a typical preparation, a mixture of HMe-Im (HMe-Im = 2-methylimidazole; 3.284 g, 40 mmol), TEA (TEA = triethylamine; 5.6 ml, 40 mmol) was dissolved in water (10 ml).  $\text{Co}(\text{NO}_3)_2 \cdot 6\text{H}_2\text{O}$  (0.73 g, 2.5 mmol) was dissolved in an equal volume of water. The mixture of two solutions was stirred for 10 minutes at room temperature. The purple precipitates was separated by centrifugation, washed with water (3 x 10 ml) and methanol (3 x 10 ml) at room temperature. Finally, the samples were evacuated under vacuum at 150 °C for 6 h, yielding 0.314 g of ZIF-67 in the form of purple crystals (56% yield)

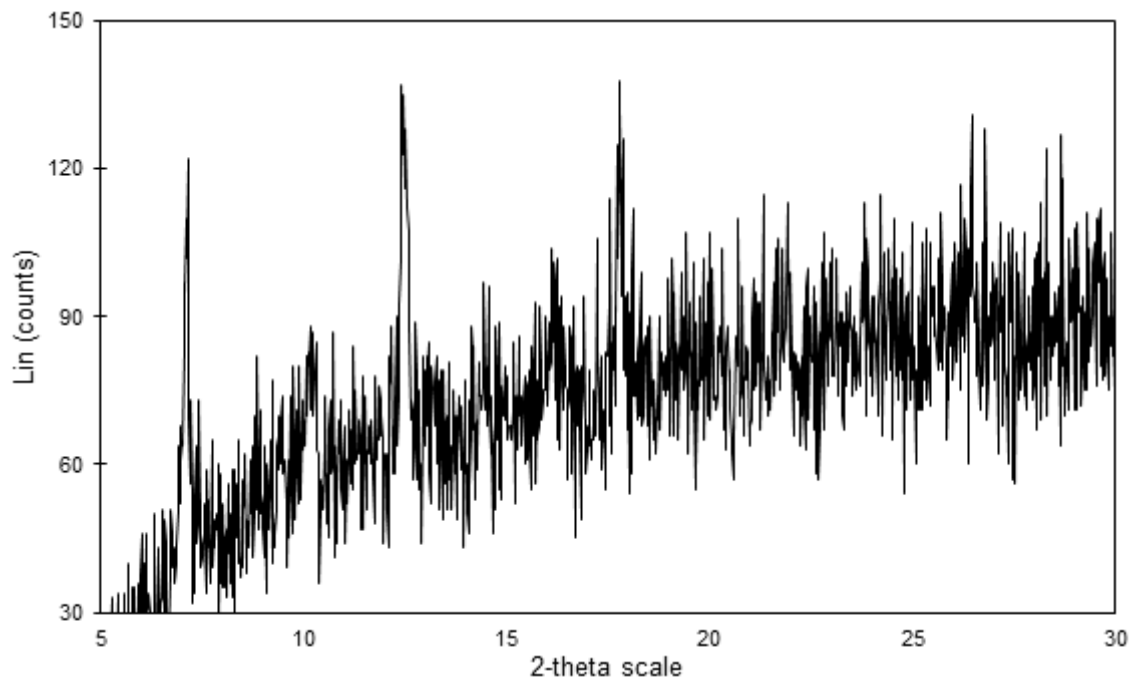

Fig S12. X – ray powder diffractogram of the ZIP-67

Elemental analysis of the  $\text{Cu}_2(\text{BDC})_2(\text{BPY})$  with ICP indicated copper content of 20.83 %.

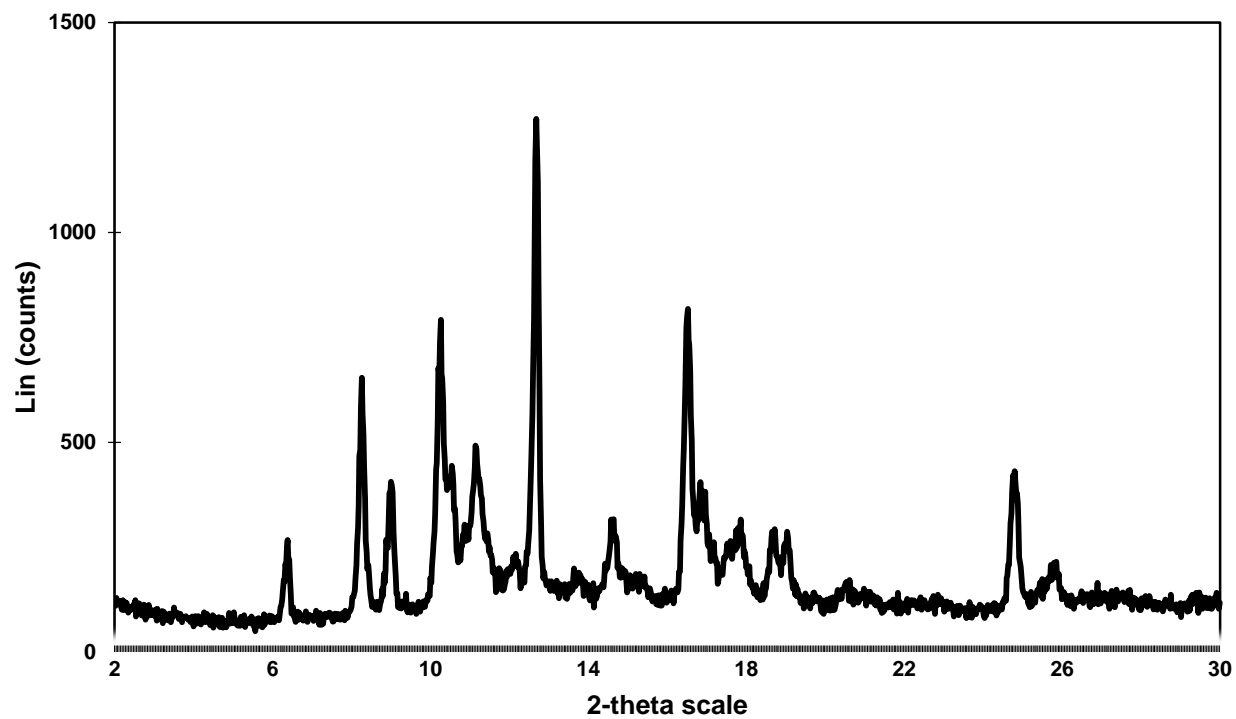

Fig S21. X-ray powder diffractograms of the  $\text{Cu}_2(\text{BDC})_2(\text{BPY})$

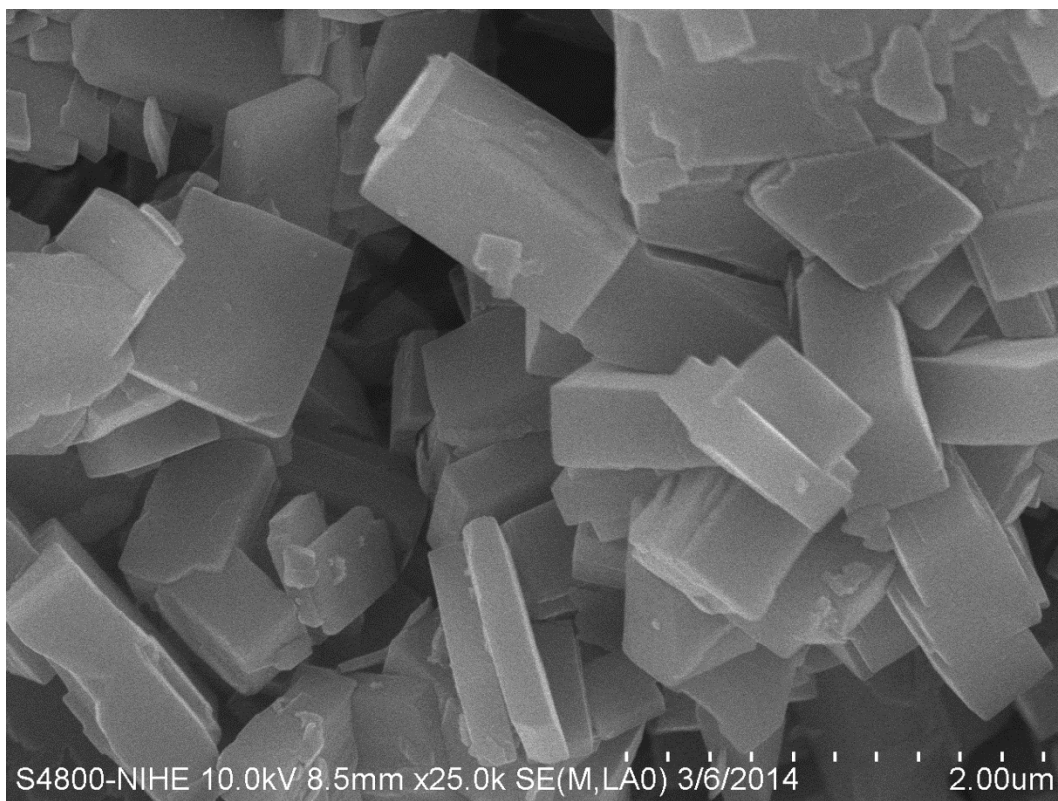

Fig S22. SEM micrograph of the  $\text{Cu}_2(\text{BDC})_2(\text{BPY})$

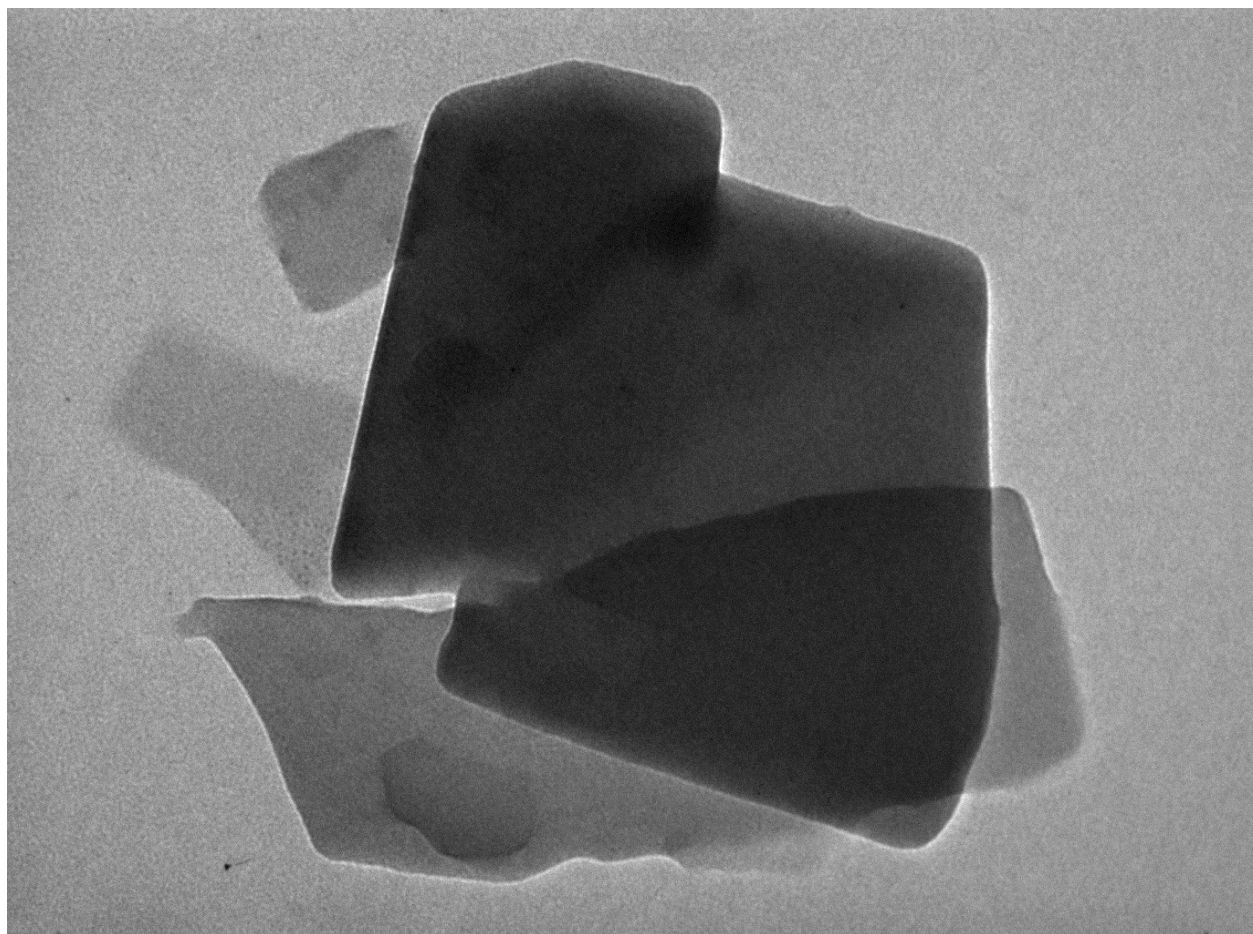

Thuan.003

Print Mag: 58200x @ 51 mm

11:04:07 a 03/07/14

TEM Mode: Imaging

  
100 nm

HV=80.0kV

Direct Mag: 30000x

Fig S23. TEM micrograph of the  $\text{Cu}_2(\text{BDC})_2(\text{BPY})$

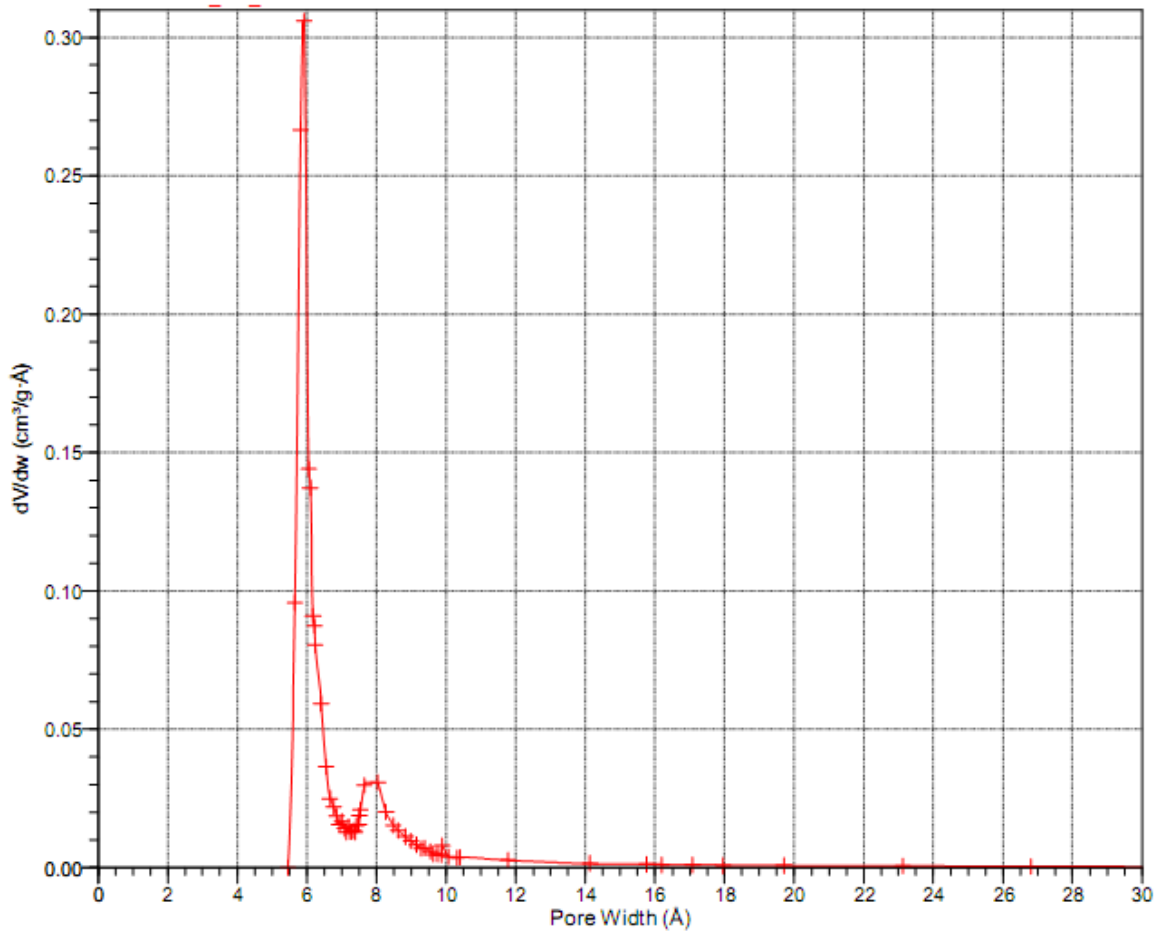

Fig S24. Pore size distribution of the  $\text{Cu}_2(\text{BDC})_2(\text{BPY})$

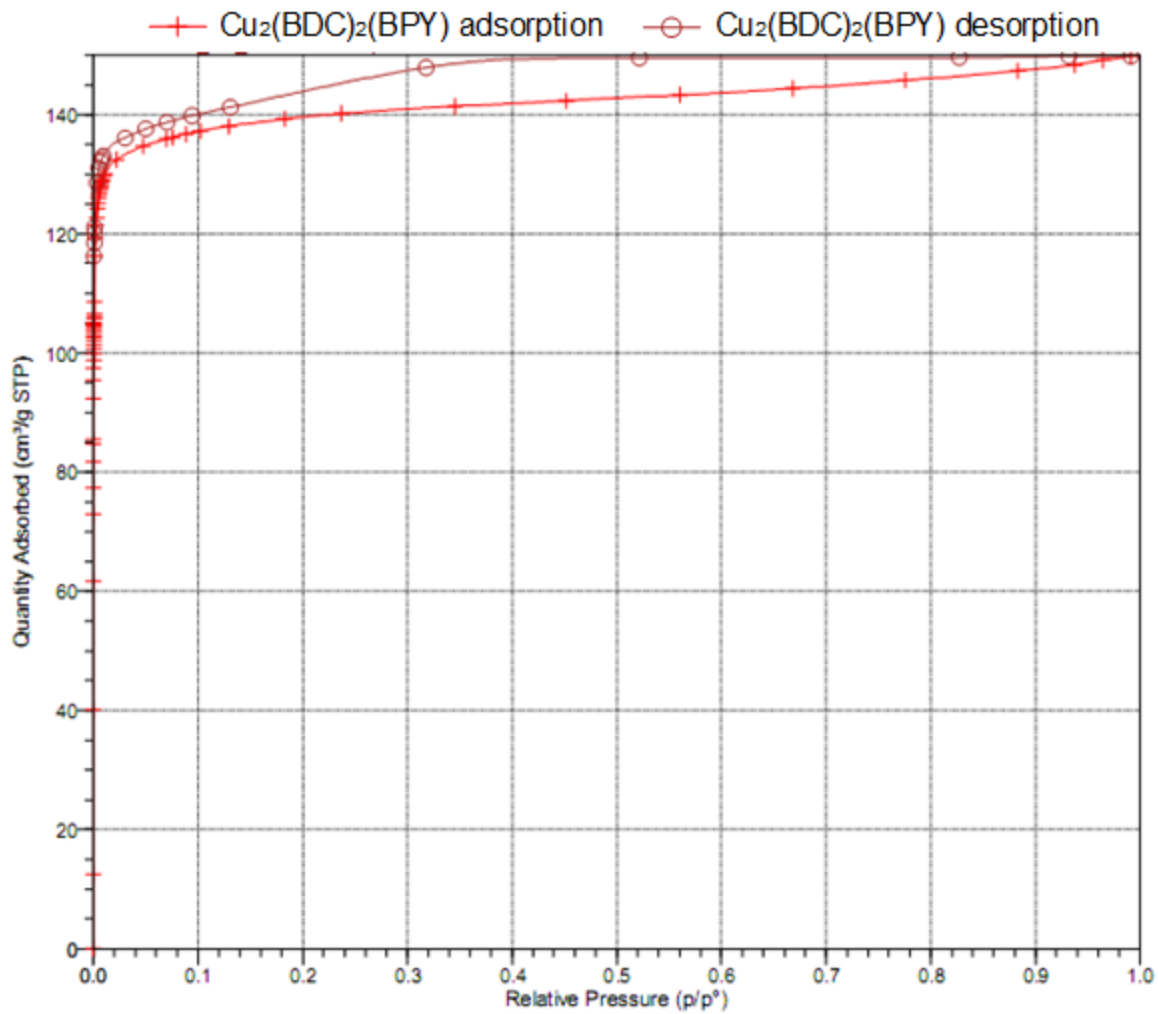

Fig S25. Nitrogen adsorption/desorption isotherm of the Cu<sub>2</sub>(BDC)<sub>2</sub>(BPY). Adsorption data are shown as closed circles and desorption data as vertical bars.

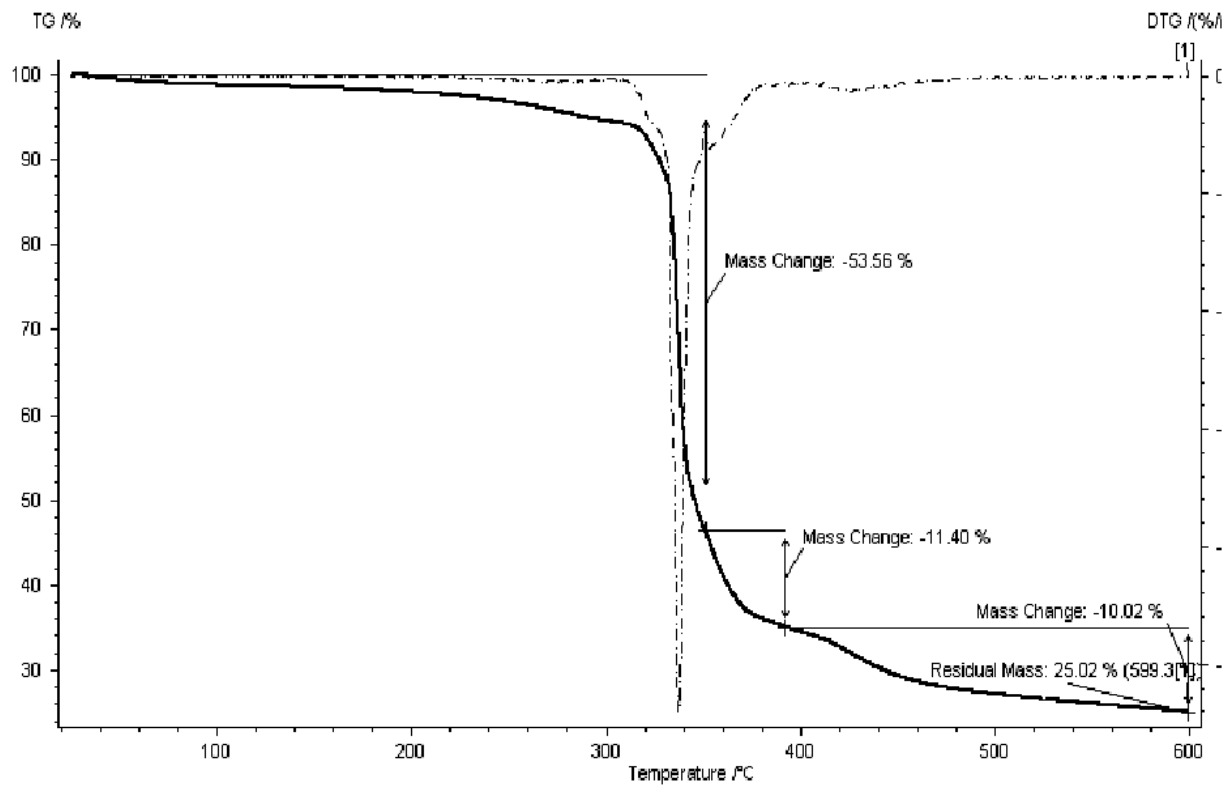

Fig S26. TGA analysis of the  $\text{Cu}_2(\text{BDC})_2(\text{BPY})$



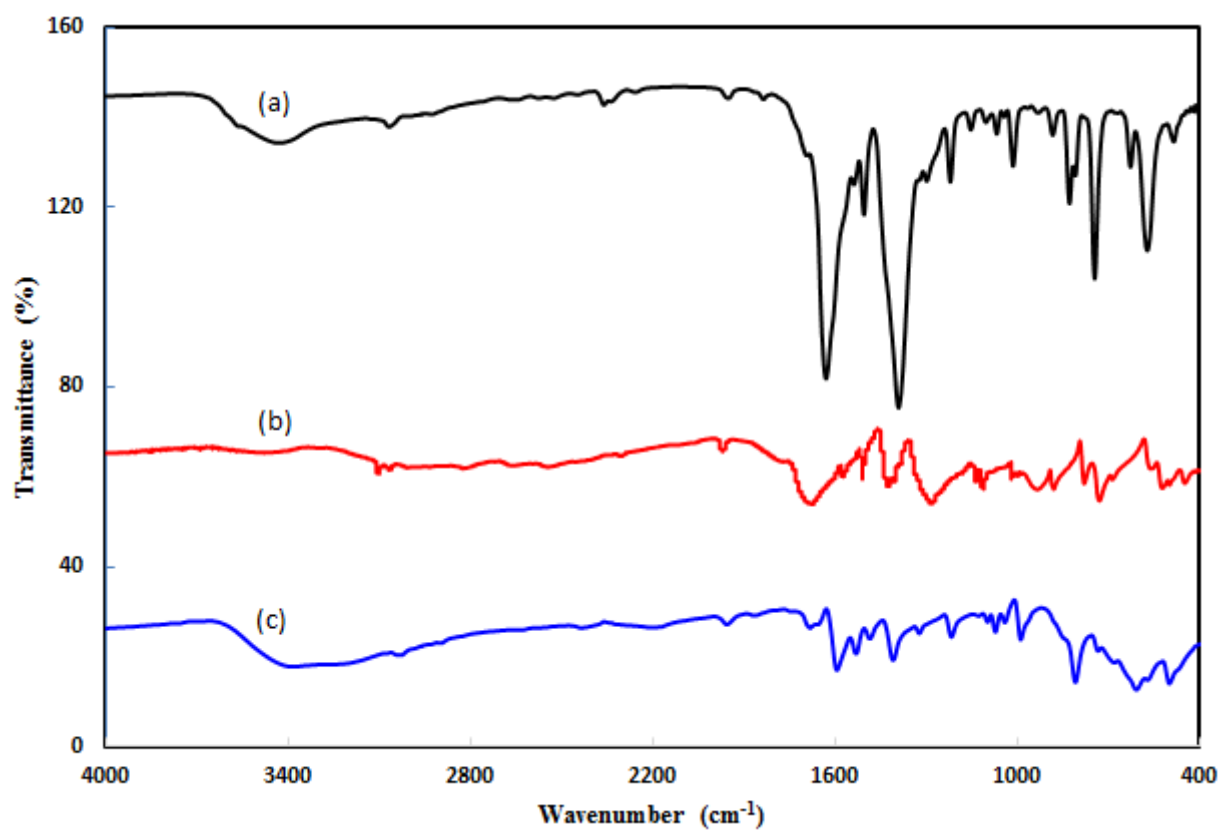

Fig S27. FT-IR spectra of the  $\text{Cu}_2(\text{BDC})_2(\text{PBY})$  (a); 4,4'-bipyridine (b); 1,4-benzenedicarboxylic acid (c)

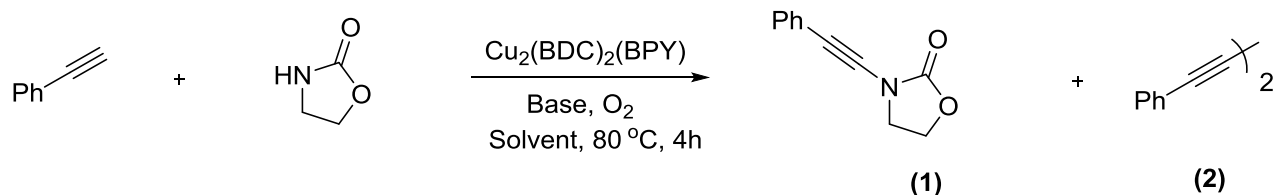

Reaction selectivity was calculated using equation: selectivity = **(1)**/[(**1**) + (**2**)]

**Table S1. Examination of role of pyridine additive<sup>a</sup>**

| Entry | Additives (amount)    | Base               | Conversion | Selectivity |
|-------|-----------------------|--------------------|------------|-------------|
| 1     | Pyridine (2 equiv.)   | NaHCO <sub>3</sub> | 95         | 92          |
| 2     | Pyridine (1 equiv.)   | NaHCO <sub>3</sub> | 85         | 84          |
| 3     | Pyridine (0.5 equiv.) | NaHCO <sub>3</sub> | 73         | 83          |
| 4     | Pyridine (2 equiv.)   | None               | 15         | <2          |
| 5     | Pyridine (4 equiv.)   | None               | 21         | <2          |

<sup>a</sup>Volume of toluene 2 mL, 0.2 mmol scale, catalyst (10 mol %), 80 °C, 4h. Gas was supplied for first 15 minutes and then disconnected. Conversion by GC analysis. 2-oxazolidinone /phenylacetylene = 5:1.

### 3-(phenylethynyl)oxazolidin-2-one (1)

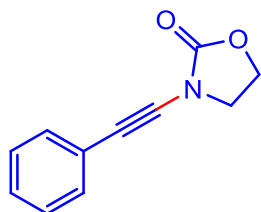

2-oxazolidinone (91.64 mg, 1.0 mmol), NaHCO<sub>3</sub> (33.60 mg, 0.4 mmol), Cu<sub>2</sub>(BDC)<sub>2</sub>(4,4'-BPY) (10.4 mg, 0.04 mmol), phenylacetylene (20.82 mg, 0.2 mmol), pyridine (31.60 mg, 0.4 mmol) and toluene (1.7 mL) were added in a sealed vial. A stream of oxygen was supplied for 15 minutes. The vial was heated up to 80°C and stirred regularly. After 4 hours, mixture was diluted by 2x10 mL of dichloromethane. Product (1) was separated by column chromatography, 29.87 mg of white crystal solid with **80%** of yield achieved.

$^1\text{H}$  NMR (300Hz,  $\text{CDCl}_3$ )  $\delta$  7.44-7.42 (m, 2H), 7.30-7.27 (m, 3H), 4.45-4.42 (t, 2H), 3.97-3.94 (t, 2H).

$^{13}\text{C}$  NMR (125 Hz,  $\text{CDCl}_3$ )  $\delta$  155.85, 131.39, 128.20, 128.06, 122.06, 79.00, 7.27, 77.02, 76.76, 70.96, 63.02, 46.50.

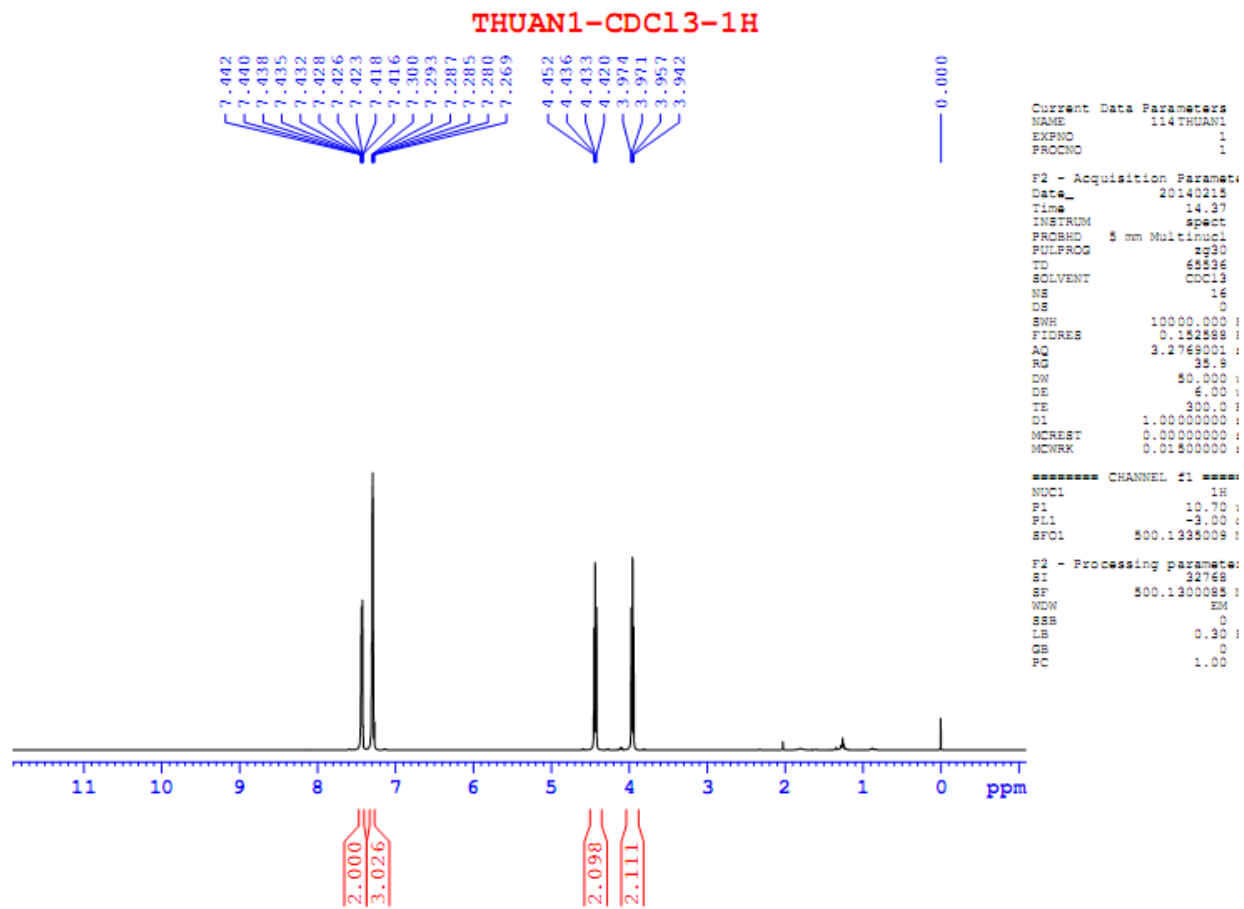

THUAN1-CDC13-C13CPD

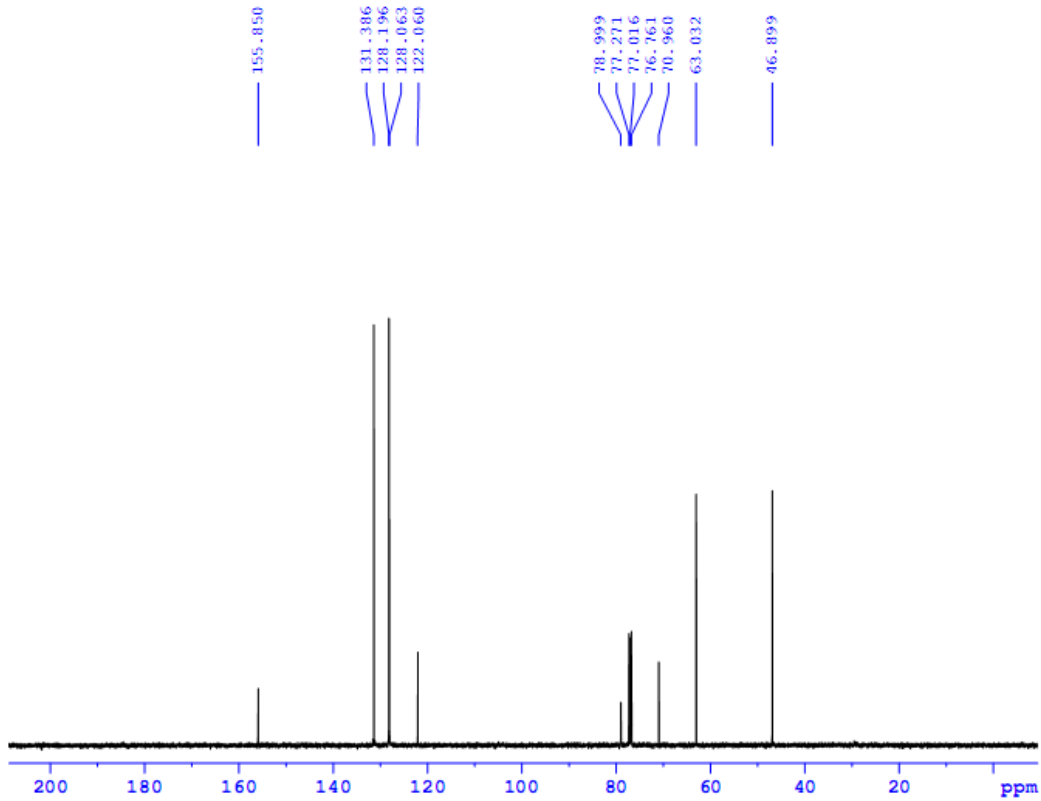

```

Current Data Parameters
NAME      114THUAN1
EXPNO    2
PROCNO   1

F2 - Acquisition Parameters
Date_    20140215
Time     14.41
INSTRUM  spect
PROBHD   5 mm Multinuc
PULPROG  zgpg30
TD        65536
SOLVENT  CDCl3
NS        64
DS         2
SWH       31446.841
FIDRES    0.478936
AQ         1.0420883
RG         32768
DW         15.900
DE         10.00
TE         300.0
D1         2.00000000
d11        0.03000000
DELTA     1.89999998
MCNEST    0.00000000
MCWRR     0.01500000

===== CHANNEL f1 =====
NUC1      13C
P1         6.50
PL1       -1.00
SFO1     125.7719472

===== CHANNEL f2 =====
CPDPRG2   waltz16
NUC2       1H
PCPD2      80.00
PL2        -3.00
PL12       14.47
PL13       22.00
SFO2     500.1320005

F2 - Processing parameters
SI         32768
SF         125.7578085
WDW        EM
SSB         0
LB         1.00
GB         0
    
```

### 3-(cyclohexylethynyl)oxazolidin-2-one (2)

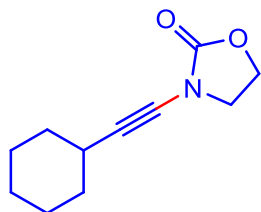

2-oxazolidinone (91.64 mg, 1.0 mmol), NaHCO<sub>3</sub> (33.60 mg, 0.4 mmol), Cu<sub>2</sub>(BDC)<sub>2</sub>(4,4'-BPY) (10.4 mg, 0.04 mmol), cyclohexylacetylene (22.06 mg, 0.2 mmol) pyridine (31.60 mg, 0.4 mmol) and toluene (1.7 mL) were added in a sealed vial. A stream of oxygen was supplied for 15 minutes. The vial was heated up to 80 °C and stirred regularly. After 4 hours, mixture was diluted by 2x10 mL of dichloromethane. Product (2) was separated by column chromatography, 18.55 mg of slightly yellow oil with **48%** of yield achieved.

<sup>1</sup>H NMR (300Hz, CDCl<sub>3</sub>) δ 4.48-4.38 (m, 2H), 3.79-3.71 (m, 2H), 2.51-2.42 (m, 1H), 1.78-1.60 (m, 4H), 1.60-1.30 (m, 4H), 1.40-1.60 (m, 2H)

cyclo

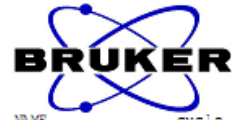

NAME cyclo  
EXPNO 2  
PROCNO 1  
Date\_ 20140305  
Time 9.47  
INSTRUM spect  
PROBHD 5 mm PABBO BB-  
PULPROG zg30  
TD 65536  
SOLVENT CDCl3  
NS 32  
DS 2  
SWH 6009.615 Hz  
FIDRES 0.091699 Hz  
AQ 5.4526453 sec  
RG 90.5  
DW 83.200 usec  
DE 6.50 usec  
TE 297.6 K  
D1 1.00000000 sec  
TD0 1

----- CHANNEL f1 -----  
NUC1 1H  
P1 12.80 usec  
PL1 0.00 dB  
PL1W 11.02718163 W  
SFO1 300.1303764 MHz  
SI 32768  
SF 300.1300000 MHz  
WDW EM  
SSB 0  
LB 0.30 Hz  
GB 0  
PC 1.00

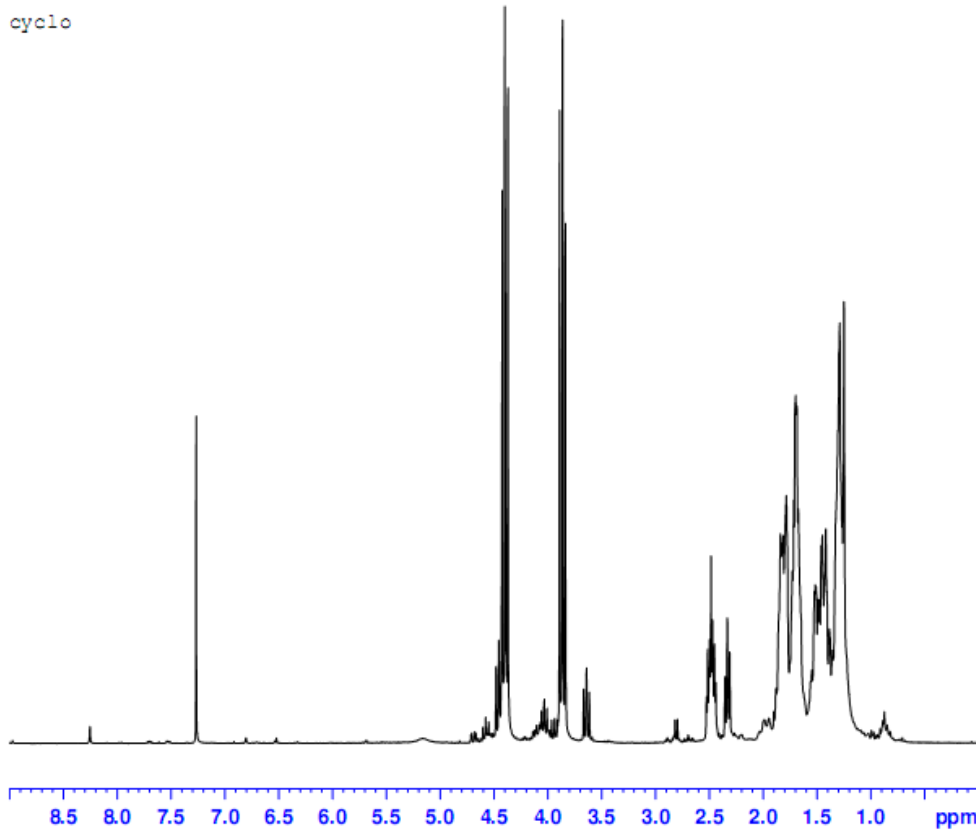

### 3-((4-methoxyphenyl)ethynyl)oxazolidin-2-one (3)

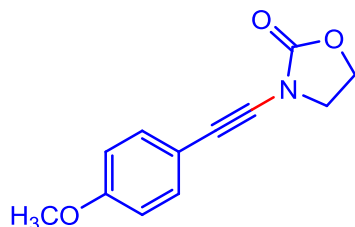

2-oxazolidinone (91.64 mg, 1.0 mmol),  $\text{NaHCO}_3$  (33.60 mg, 0.4 mmol),  $\text{Cu}_2(\text{BDC})_2(4,4'\text{-BPY})$  (10.4 mg, 0.04 mmol), 4-ethynylanisol (26.412 mg, 0.2 mmol), pyridine (31.60 mg, 0.4 mmol) and toluene (1.7 mL) were added in a sealed vial. A stream of oxygen was supplied for 15 minutes. The vial was heated up to  $80^\circ\text{C}$  and stirred regularly. After 6 hours, mixture was diluted by 2x10 mL of dichloromethane. Product (3) was separated by column chromatography, 36.90 mg of white crystal solid with **85%** of yield achieved.

$^1\text{H}$  NMR (300Hz,  $\text{CDCl}_3$ )  $\delta$  7.40-7.37 (d, 2H), 6.85-6.82 (d, 2H), 4.49-4.43 (m, 2H), 4.00-4.94 (m, 2H), 3.80 (s, 3H)

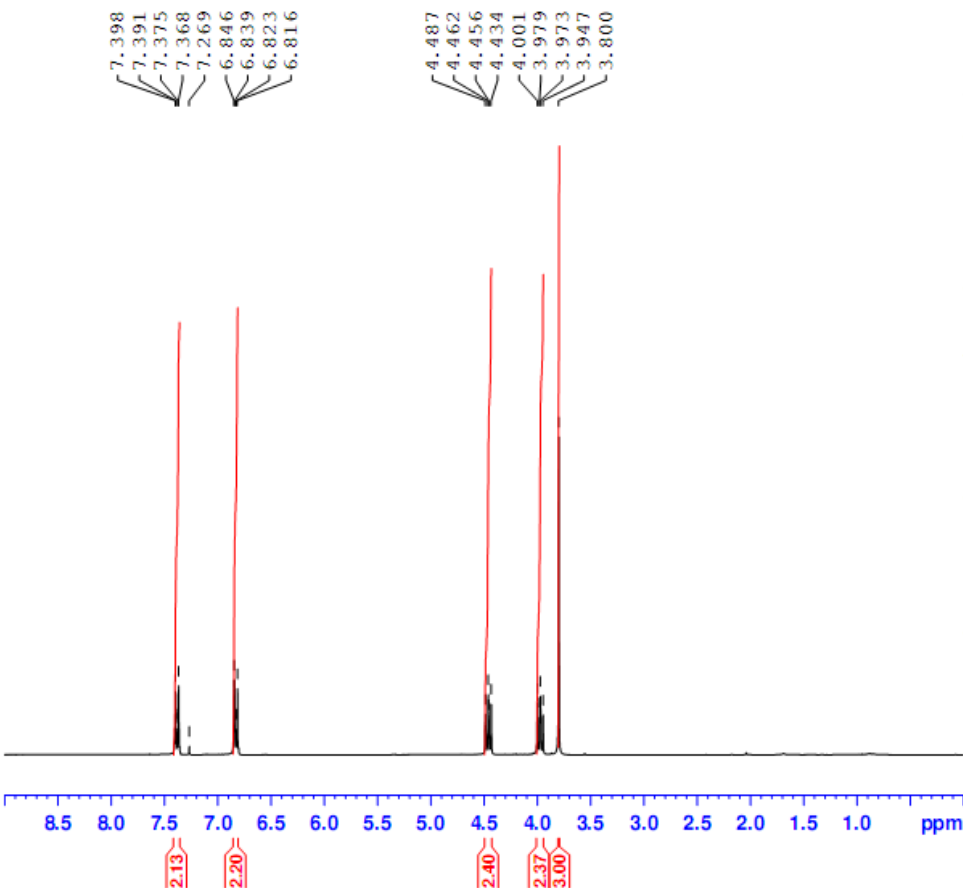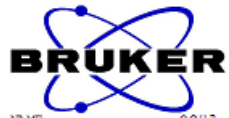

```

NAME          OCH3
EXPNO         2
PROCNO        1
Date_         20140305
Time          9.25
INSTRUM       spect
PROBHD        5 mm F4BBO BB-
PULPROG       zgpg
TD            65536
SOLVENT       CDCl3
NS            32
DS            2
SNH           6009.615 Hz
FIDRES        0.091699 Hz
AQ            5.452643 sec
RG            80.6
DN            83.200 usec
DE            6.50 usec
TE            297.5 K
DL            1.00000000 sec
DL2           0.00002000 sec
TD0           1

===== CHANNEL f1 =====
NUC1          1H
P1            12.80 usec
PL1           0.00 dB
PL9           55.00 dB
PL1W         11.02718163 W
PL9W         0.00003487 W
RF01         300.1303784 MHz
RF          327.68
NUC2
NDW          300.1300000 MHz
SSB          EM
GB           0
LB           0.30 Hz
GB           0
PC           1.00

```



### 3-(octynyl)oxazolidin-2-one (4)

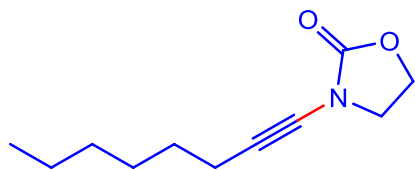

2-oxazolidinone (91.64 mg, 1.0 mmol),  $\text{NaHCO}_3$  (33.60 mg, 0.4 mmol),  $\text{Cu}_2(\text{BDC})_2(4,4'\text{-BPY})$  (10.4 mg, 0.04 mmol), 1-octyne (22.02 mg, 0.2 mmol), pyridine (31.60 mg, 0.4 mmol) and toluene (1.7 mL) were added in a sealed vial. A stream of oxygen was supplied for 15 minutes. The vial was heated up to  $80^\circ\text{C}$  and stirred regularly. After 6 hours, mixture was diluted by 2x10 mL of dichloromethane. Product (4) was separated by column chromatography, 37.48 mg of slightly yellow oil with **96%** of yield achieved.

$^1\text{H}$  NMR (300Hz,  $\text{CDCl}_3$ )  $\delta$  4.42-4.27 (t, 2H), 3.89-3.83 (t, 2H), 2.31-2.26 (t, 2H), 1.54-1.46 (m, 2H), 1.39-1.24 (m, 6H), 0.90 (t, 3H)

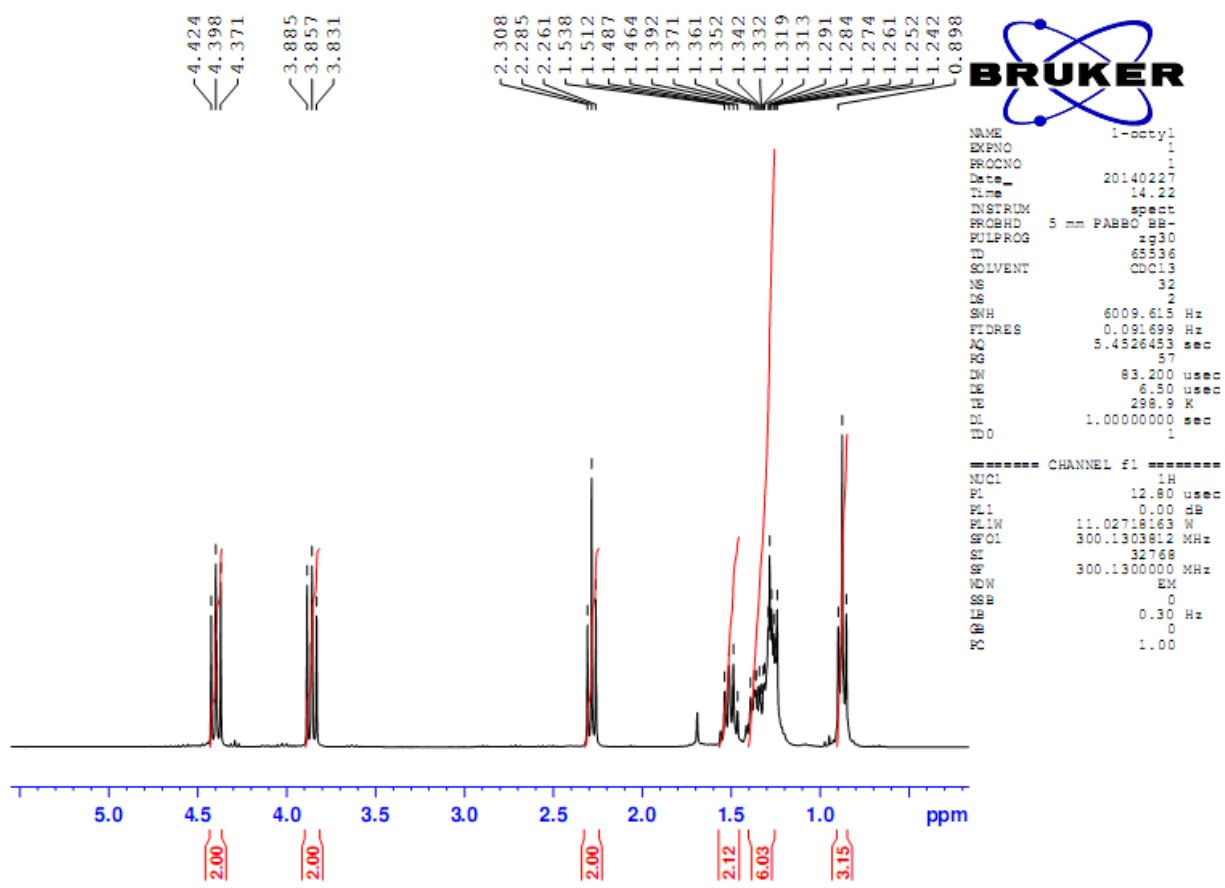

### N,4-dimethyl-N-(phenylethynyl)benzenesulfonamide (5)

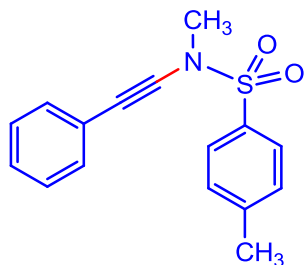

#### *Synthesis of N,4-dimethylbenzenesulfonamide.*

Methylamine (8.0 mL, 8.0 mol/L in methanol, 64 mmol) was dropwised to a solution of 4-methylbenzenesulfonyl chloride (4.72 g, 24.757 mmol) in THF (100 mL) at 10°C for 15 minutes. Then, the reaction mixture was stirred at room temperature for 1 hour, poured into water and extracted with dichloromethane (500 mL). The organic layer was dried over Na<sub>2</sub>SO<sub>4</sub>. Finally, liquid was concentrated, 4.27 gram of pure sulfoamide achieved (93% of yield).

N,4-dimethylbenzenesulfonamide (280 mg, 1.0 mmol), NaHCO<sub>3</sub> (33.60 mg, 0.4 mmol), Cu<sub>2</sub>(BDC)<sub>2</sub>(4,4'-BPY) (10.4 mg, 0.04 mmol), pyridine (31.60 mg, 0.4 mmol) and toluene (0.8 mL) were added in a sealed vial. A stream of oxygen was supplied for 15 minutes. The vial was heated up to 70°C and stirred regularly. A mixture of phenylacetylene (20.82 mg, 0.2 mmol) in toluene (0.9 mL) was dropwised into vial during 4 hours and kept mixture at 70°C for another 4 hours. After totally 8 hours, mixture was diluted by 2x10 mL of dichloromethane. Product (5) was separated by column chromatography, 30.80 mg of white crystal solid with **54%** of yield achieved.

<sup>1</sup>H NMR (300Hz, CDCl<sub>3</sub>) δ 7.86-7.84 (d, 2H), 7.39-7.35 (m, 4H), 7.30-7.27 (m, 3H), 3.162 (s, 3H), 2.469 (s, 3H)

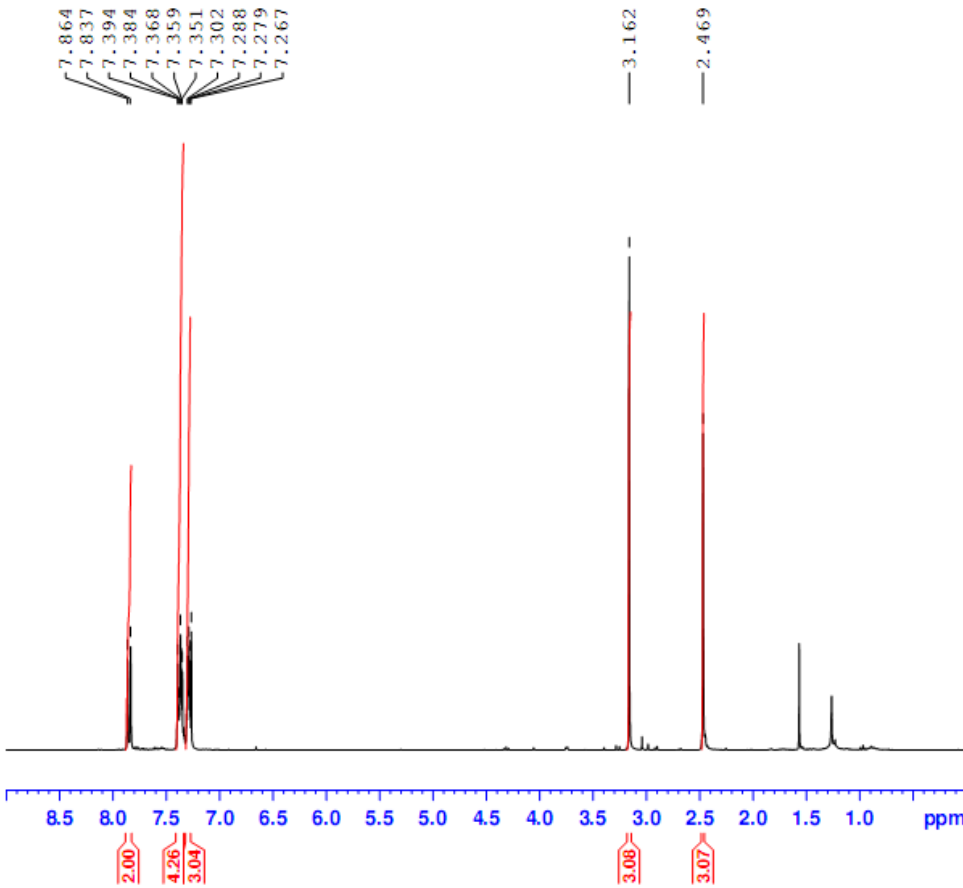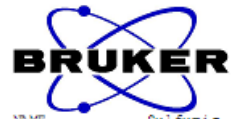

```

NAME      Sulfonic
EXPNO     1
PROCNO    1
Date_     20140227
Time      14.49
INSTRUM   spect
PROBHD    5 mm PABBO BB-
PULPROG   zg30
TD         65536
SOLVENT   CDCl3
NS         32
DS         2
SWH        6009.615 Hz
FIDRES     0.091699 Hz
AQ         5.4526453 sec
RG         181
UN         83.200 usec
HE         6.50 usec
HU         299.1 K
DL         1.00000000 sec
WDW        1

```

```

===== CHANNEL f1 =====
NUC1      1H
P1        12.80 usec
PL1       0.00 dB
PL1W      11.02716163 W
SFO1      300.1303812 MHz
SI         32768
SF         300.1300000 MHz
WDW        EM
SSB        0
LB         0.30 Hz
GB         0
PC         1.00

```

**(S)-(+)-4-phenyl-3-(phenylethynyl)oxazolidin-2-one (6)**

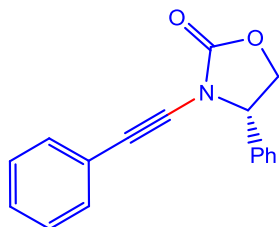

(S)-(+)-4-phenyloxazolidin-2-one (168.09 mg, 1.0 mmol), NaHCO<sub>3</sub> (33.60 mg, 0.4 mmol), Cu<sub>2</sub>(BDC)<sub>2</sub>(4,4'-BPY) (10.4 mg, 0.04 mmol), pyridine (31.60 mg, 0.4 mmol) and toluene (0.8 mL) were added in a sealed vial. A stream of oxygen was supplied for 15 minutes. The vial was heated up to 70°C and stirred regularly. A mixture of phenylacetylene (20.82 mg, 0.2 mmol, 1 eqv) in toluene (0.9 mL) was dropwised into vial during 4 hours and kept mixture at 70°C for another 4 hours. After totally 8 hours, mixture was diluted by 2x10 mL of dichloromethane. Product (6) was separated by column chromatography, 16.32 mg of yellow crystal solid with **31%** of yield achieved.

<sup>1</sup>H NMR (300Hz, CDCl<sub>3</sub>) δ 7.45-7.39 (m, 5H), 7.28.-7.21 (m, 5H), 5.18-5.12 (t, 1H), 4.82-4.76 (t, 1H), 4.35-4.29 (t, 1H).

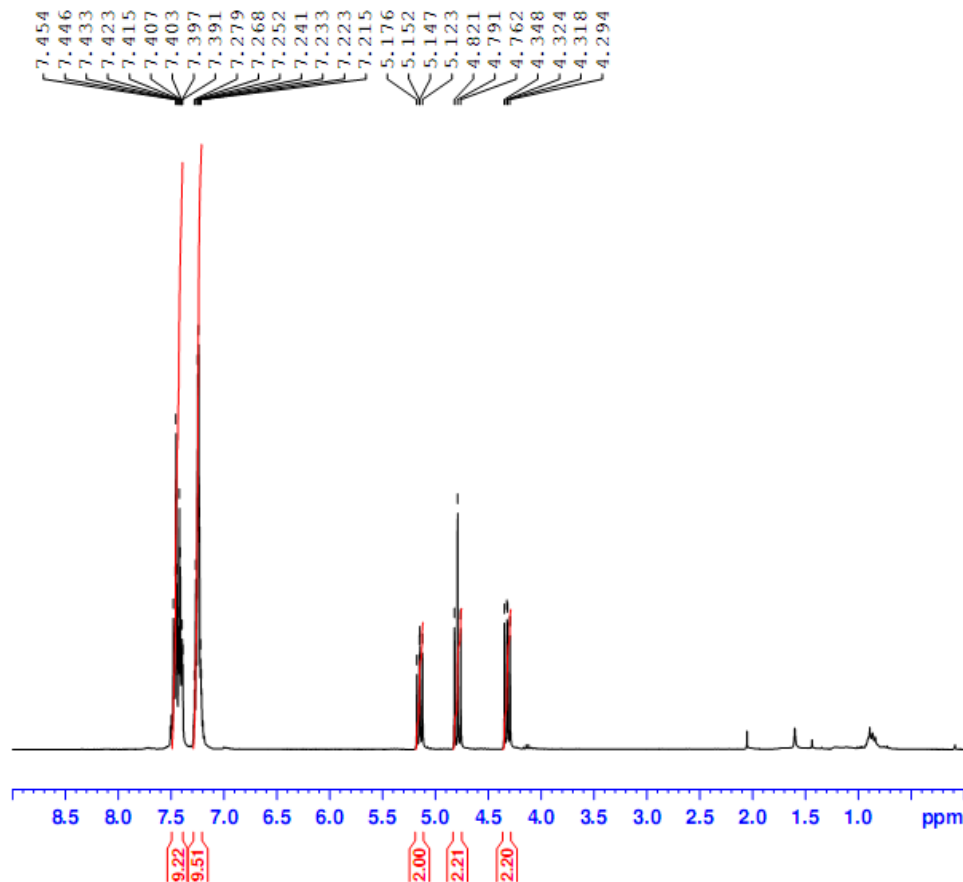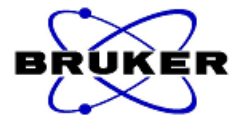

```

NAME          8+
EXPNO         3
PROCNO        1
Date_         20140305
Time          9.57
INSTRUM       spect
PROBHD        5 mm PABBO BB-
PULPROG       zgpg30
TD            65536
SOLVENT       CDCl3
NS            32
DS            2
SWH           6009.615 Hz
FIDRES        0.091699 Hz
AQ            5.4526453 sec
RG            90.5
DM            83.200 usec
DE            6.50 usec
TE            297.7 K
D1            1.00000000 sec
D12           0.00002000 sec
TD0           1

===== CHANNEL f1 =====
NUC1          1H
P1            12.80 usec
PL1           0.00 dB
PL2           55.00 dB
PL12         11.02718163 W
PL13         0.00003487 W
SFO1         300.1303805 MHz
SF           32768
SF           300.1300000 MHz
WDW           EM
SSB           0
LB            0.30 Hz
GB            0
PC            1.00

```

### 3-(*p*-tolylethynyl)oxazolidin-2-one (7)

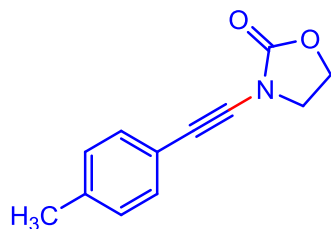

2-oxazolidinone (91.64 mg, 1.0 mmol), NaHCO<sub>3</sub> (33.60 mg, 0.4 mmol), Cu<sub>2</sub>(BDC)<sub>2</sub>(4,4'-BPY) (10.4 mg, 0.04 mmol), *p*-tolylacetylene (23.91 mg, 0.2 mmol), pyridine (31.60 mg, 0.4 mmol) and toluene (1.7 mL) were added in a sealed vial. A stream of oxygen was supplied for 15 minutes. The vial was heated up to 80°C and stirred regularly. After 4 hours, mixture was diluted by 2x10 mL of dichloromethane. Product (7) was separated by column chromatography, 34.58 mg of white crystal solid with **86%** of yield achieved.

<sup>1</sup>H NMR (300Hz, CDCl<sub>3</sub>) δ 7.34-7.26 (m, 2H), 7.12-7.10 (m, 2H), 4.49-4.46 (t, 2H), 4.00-3.98 (t, 2H), 2.36-2.34 (s, 3H)

M1-CDCl3-1H

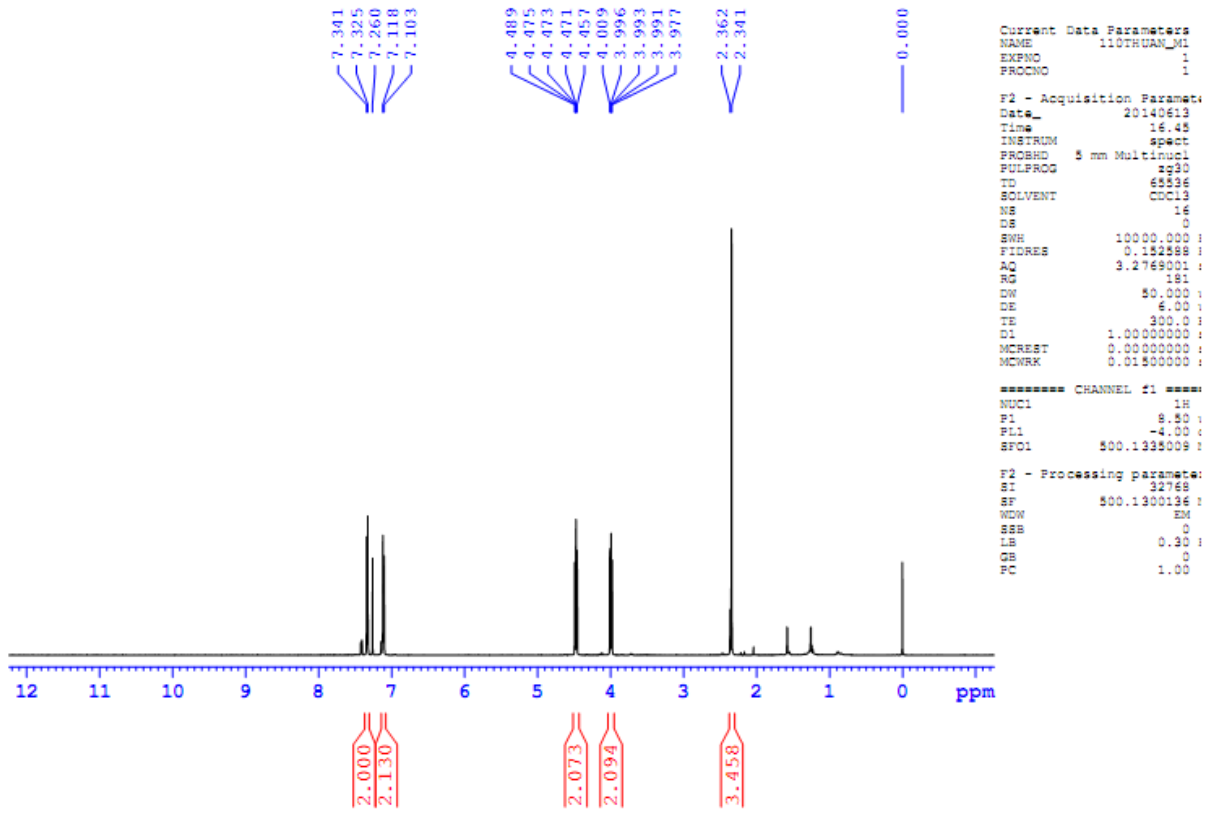



**1-(1-(phenylethynyl)-1H-indol-3-yl)ethanone (8)**

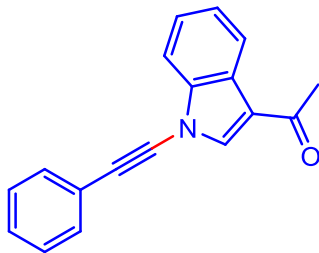

3-acetylidole (162 mg, 1.0 mmol),  $\text{KHCO}_3$  (60 mg, 0.6 mmol),  $\text{Cu}_2(\text{BDC})_2(4,4'\text{-BPY})$  (15.78 mg, 0.06 mmol, 30 mol%), phenylacetylene (20.82 mg, 0.2 mmol), pyridine (47.4 mg, 3 eqv) and toluene (1.7 mL) were added in a sealed vial. A stream of oxygen was supplied for 15 minutes. The vial was heated up to  $100^\circ\text{C}$  and stirred regularly. After 8 hours, mixture was diluted by 2x10 mL of dichloromethane. Product (8) was separated by column chromatography, 16.58 mg of yellow crystal solid with **32%** of yield achieved.

$^1\text{H}$  NMR (300Hz,  $\text{CDCl}_3$ )  $\delta$  8.40-8.38 (d, 1H), 7.93 (s, 1H), 7.65-7.63 (m, 1H), 7.59-7.57 (m, 2H), 7.43-7.27 (m, 5H), 2.57 (s, 1H).

M1-CDC13-1H

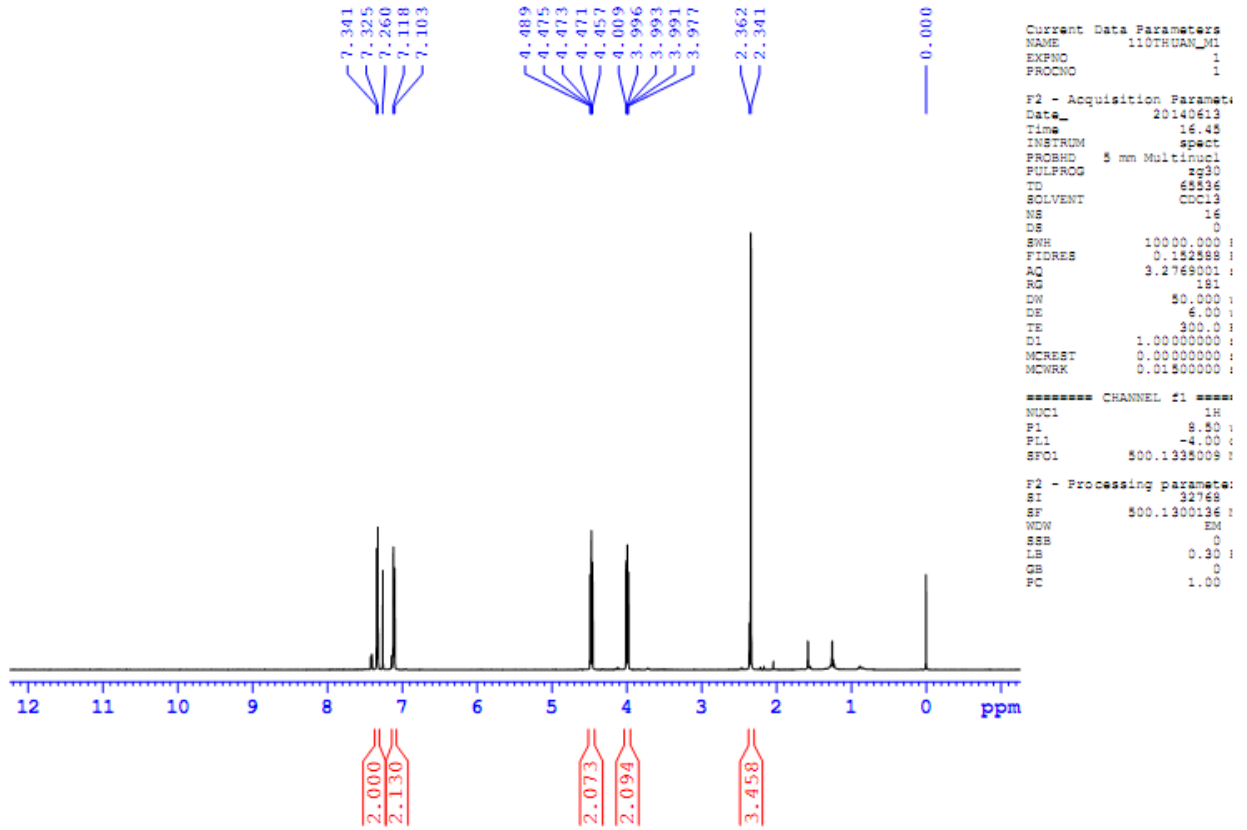

### 3-(cyclopentylethynyl)oxazolidin-2-one (9)

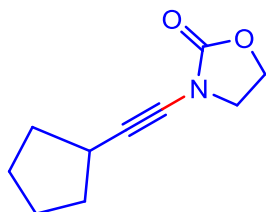

2-oxazolidinone (91.64 mg, 1.0 mmol),  $\text{NaHCO}_3$  (33.60 mg, 0.4 mmol),  $\text{Cu}_2(\text{BDC})_2(4,4'\text{-BPY})$  (15.78 mg, 0.06 mmol, 30 mol%), cyclopentylacetylene (19.79 mg, 0.2 mmol), pyridine (47.4 mg, 3 eqv) and toluene (1.7 mL) were added in a sealed vial. A stream of oxygen was supplied for 15 minutes. The vial was heated up to  $80^\circ\text{C}$  and stirred regularly. The vial heated up to  $70^\circ\text{C}$  and stirred regularly. After 8 hours, mixture was diluted by 2x10 mL of dichloromethane. Product (9) was separated by column chromatography, 14.2 mg of slightly oil with **40%** of yield achieved.

$^1\text{H NMR}$  (300Hz,  $\text{CDCl}_3$ )  $\delta$  4.42-4.39 (t, 2H), 3.88-3.85 (t, 2H), 2.74-2.71 (m, 1H), 1.95-1.91 (m, 2H), 1.74-1.70 (m, 2H), 1.67-1.54 (m, 4H)

M2-CDCl3-1H

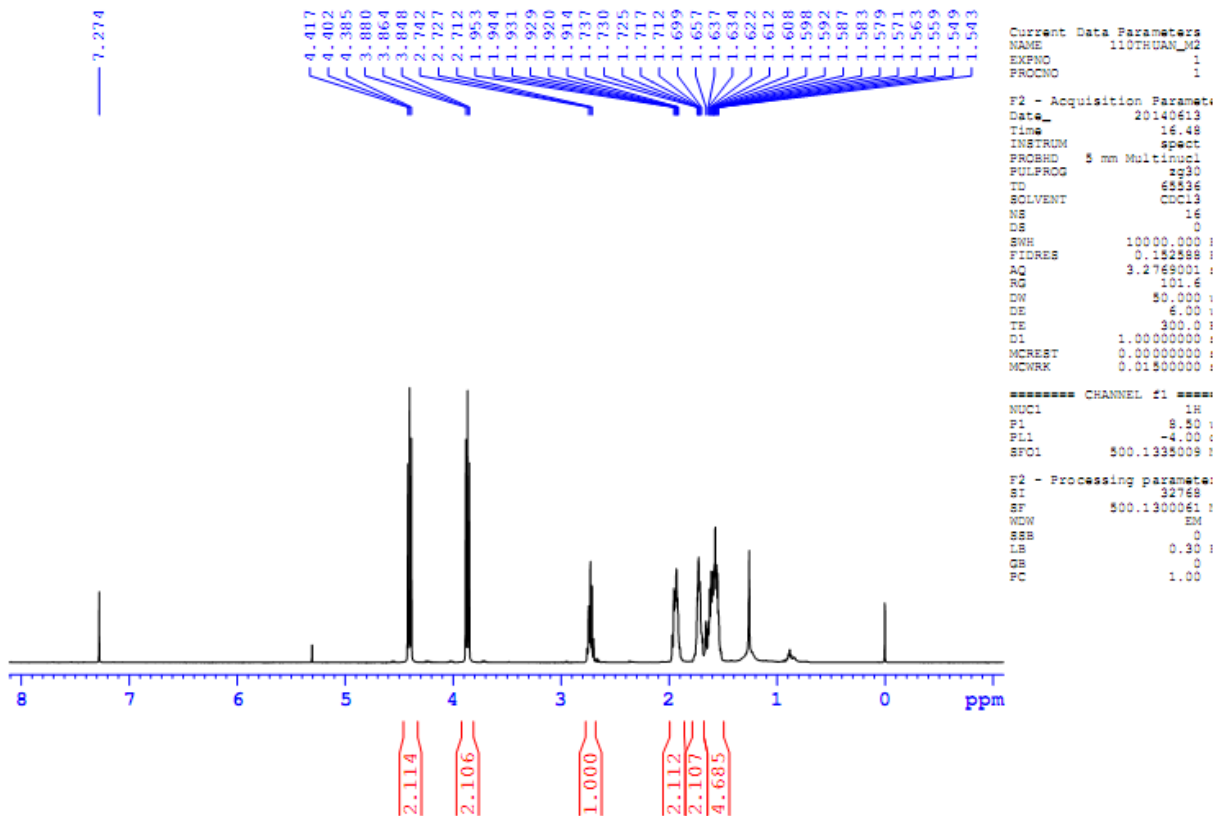

### N-phenyl-N-(phenylethynyl)aniline (10)

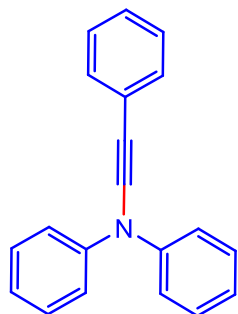

Dipenylamine (170 mg, 1.0 mmol),  $\text{NaHCO}_3$  (33.60 mg, 0.4 mmol),  $\text{Cu}_2(\text{BDC})_2(4,4'\text{-BPY})$  (10.4 mg, 0.04 mmol), phenylacetylene (20.82 mg, 0.2 mmol), pyridine (47.4 mg, 3 eqv) and toluene (1.7 mL) were added in a sealed vial. A stream of oxygen was supplied for 15 minutes. The vial was heated up to 100 °C and stirred regularly. After 8 hours, mixture was diluted by 2x10 mL of dichloromethane. 100% of conversion and 70% of selectivity were achieved.

## REFERENCE

- [1] C.G. Carson, K. Hardcastle, J. Schwartz, X. Liu, C. Hoffmann, R.A. Gerhardt, R. Tannenbaum, *Eur. J. Inorg. Chem.* (2009), 2338-2343
- [2] L. T. L. Nguyen, T. T. Nguyen, K. D. Nguyen, N. T. S. Phan, *App. Catal. A* 425-426 (2012) 44-52
- [3] D. Britt, D. Tranchemontagne, O. M. Yaghi, *PNASS* 33 (2008) 11623-11627
- [4] K. Tan, N. Nijem, P. Canepa, Q. Gong, J. Li, T. Thonhauser, Y. J. Chaba, *Chemistry of Materials* 24 (2012) 3153-3167
- [5] B. Arstad, H. Fjellvag, K. O. Kongshaug, O. Swang, R. Blom, *Adsorption* 14 (2008) 755-762.
- [6] T. Ladrak, S. Smulders, O. Roubeau, S. J. Teat, P. Gamez, J. Reedijk, *Eur. J. Inorg. Chem.* (2010), 3804-3812
- [7] Lin, Kuen-Song; Adhikari, Abhijit Krishna; Chang, Kai-Che; Chiang, Chao-Lung; Wang, Chieh-Hung, *Journal of Nanoscience and Nanotechnology* 14 ( 2014), 2700-2708
- [8] K. Tan, N. Nijem, P. Canepa, Q. Gong, J. Li, T. Thonhauser, Y.J. Chabal, *Chem. Mater.* 24 (2012) 3153-3167
- [9] P. Mishra, S. Edubilli, B. Mandal, S. Gumma, *Micropor. Mesopor. Mater.* 169 (2013) 75-80
- [10] K. Seki, W. Mori, *J. Phys. Chem. B* 106 (2002) 1380-1385
- [11] S. Achmann, G. Hagen, M. Hämmerle, I. Malkowsky, C. Kiener, R. Moos, *Chem. Eng. Technol.* 33 (2010) 275-280

- [12] Nam T.S. Phan, Tung T. Nguyen, Anh H. Ta, *Journal of Molecular Catalysis A: Chemical*, 365 (2012), 95-102
- [13] Mansoor Anbia, Vahid Hoseini, Sara Sheykhi, *Journal of Industrial and Engineering Chemistry* 18 (2012) 1149–1152
- [14] Andrea C. Sudik, Adrien P. Côte, and Omar M. Yaghi, *Inorg. Chem.* 44 (2005), 2998–3000
